# Supplementary material for: The structure of NAD+ consuming protein Acinetobacter baumannii TIR domain shows unique kinetics and conformations
Source: PubMed Central journal article supplement — J Biol Chem. 2023 Sep 25;299(11):105290. doi: 10.1016/j.jbc.2023.105290 (PMC10641520; doi:10.1016/j.jbc.2023.105290), 2023-09-25
Supplement: mmc3.pdf [file mmc3.pdf]

### A. *A. baumannii* TIR Protein Expression and Crystallization

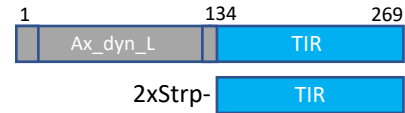

*A. Baumannii* TIR domain containing protein

AbTir-TIR expression construct

### B. SDS-PAGE AbTIR

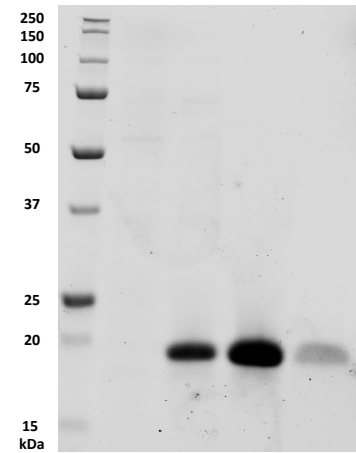

### C. Crystallization

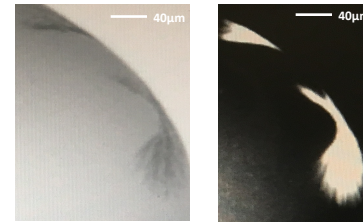

### D. Optimization

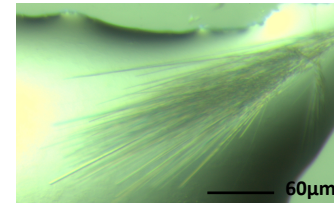

### E. Co-crystallization and Soaking

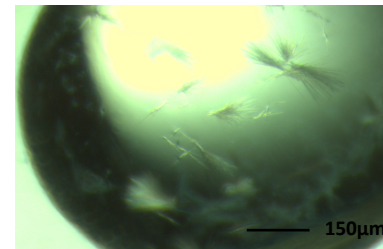

NAD+

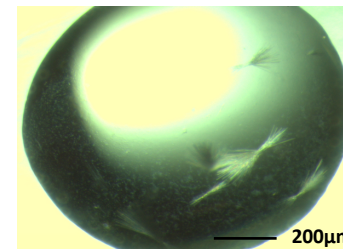

NAM
