# Supplementary figures and images for: The structure of NAD+ consuming protein Acinetobacter baumannii TIR domain shows unique kinetics and conformations
Source: PubMed Central journal article supplement — J Biol Chem. 2023 Sep 25;299(11):105290. doi: 10.1016/j.jbc.2023.105290 (PMC10641520; doi:10.1016/j.jbc.2023.105290), 2023-09-25

A) AbTIR<sup>wt</sup> -IPTG

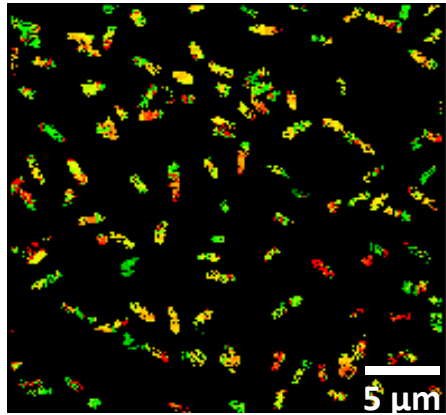

B) AbTIR<sup>wt</sup> +IPTG

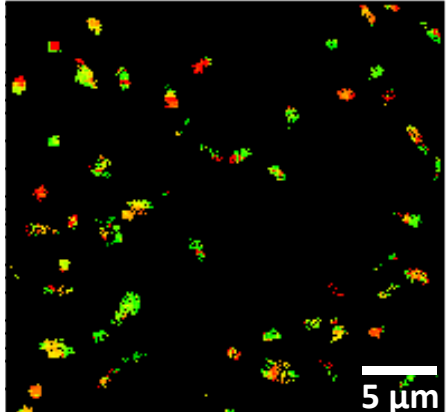

C) AbTIR<sup>E208A</sup> -IPTG

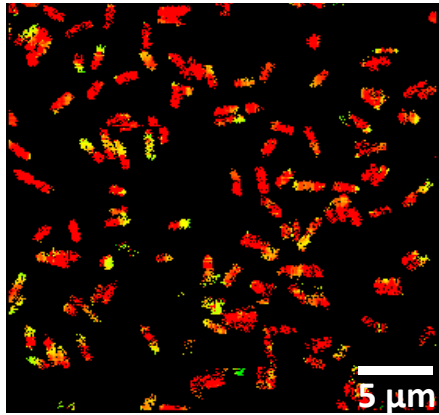

D) AbTIR<sup>E208A</sup> +IPTG

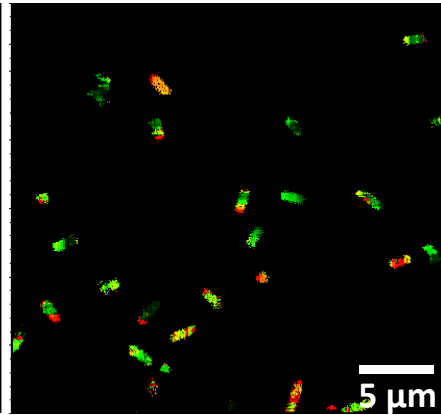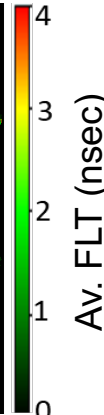

E)

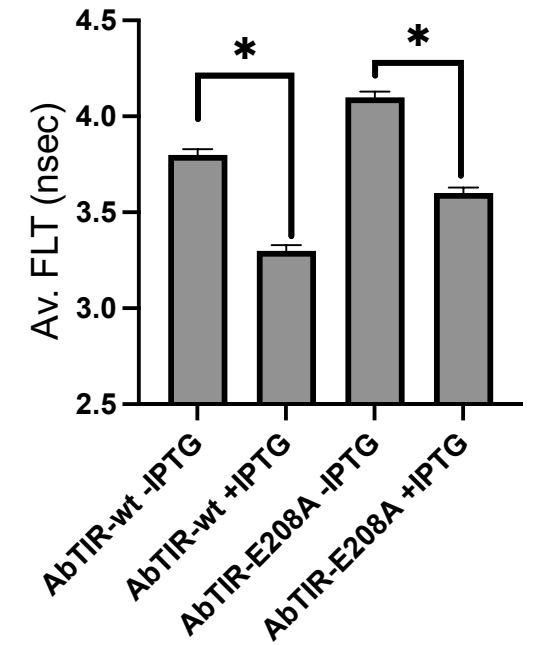

Supplement: mmc4.pdf [file mmc4.pdf]

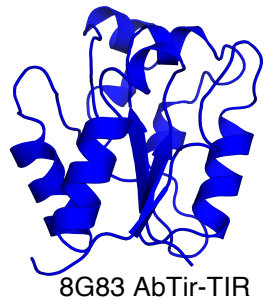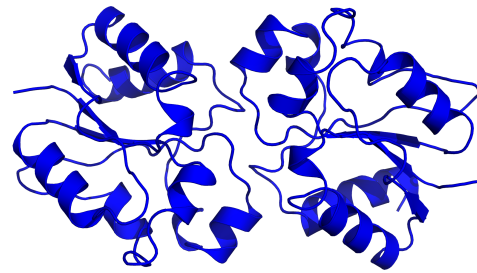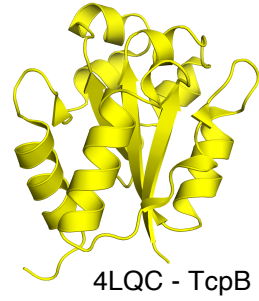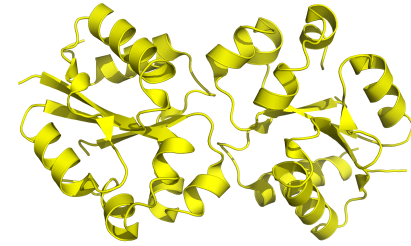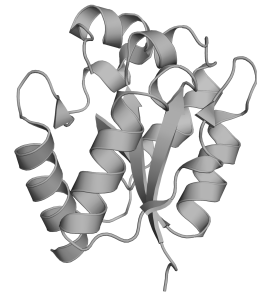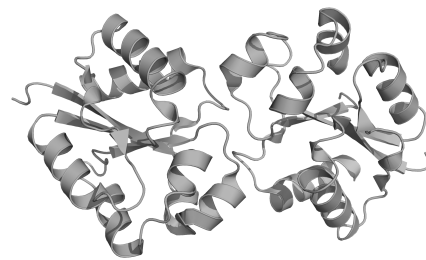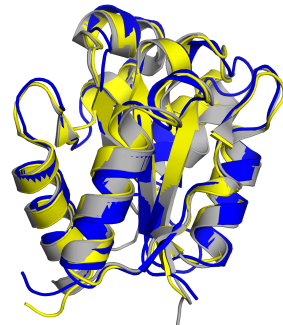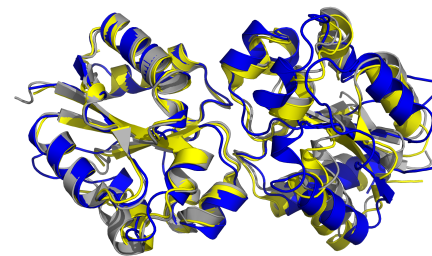

sFig 4

Supplement: mmc5.pdf [file mmc5.pdf]

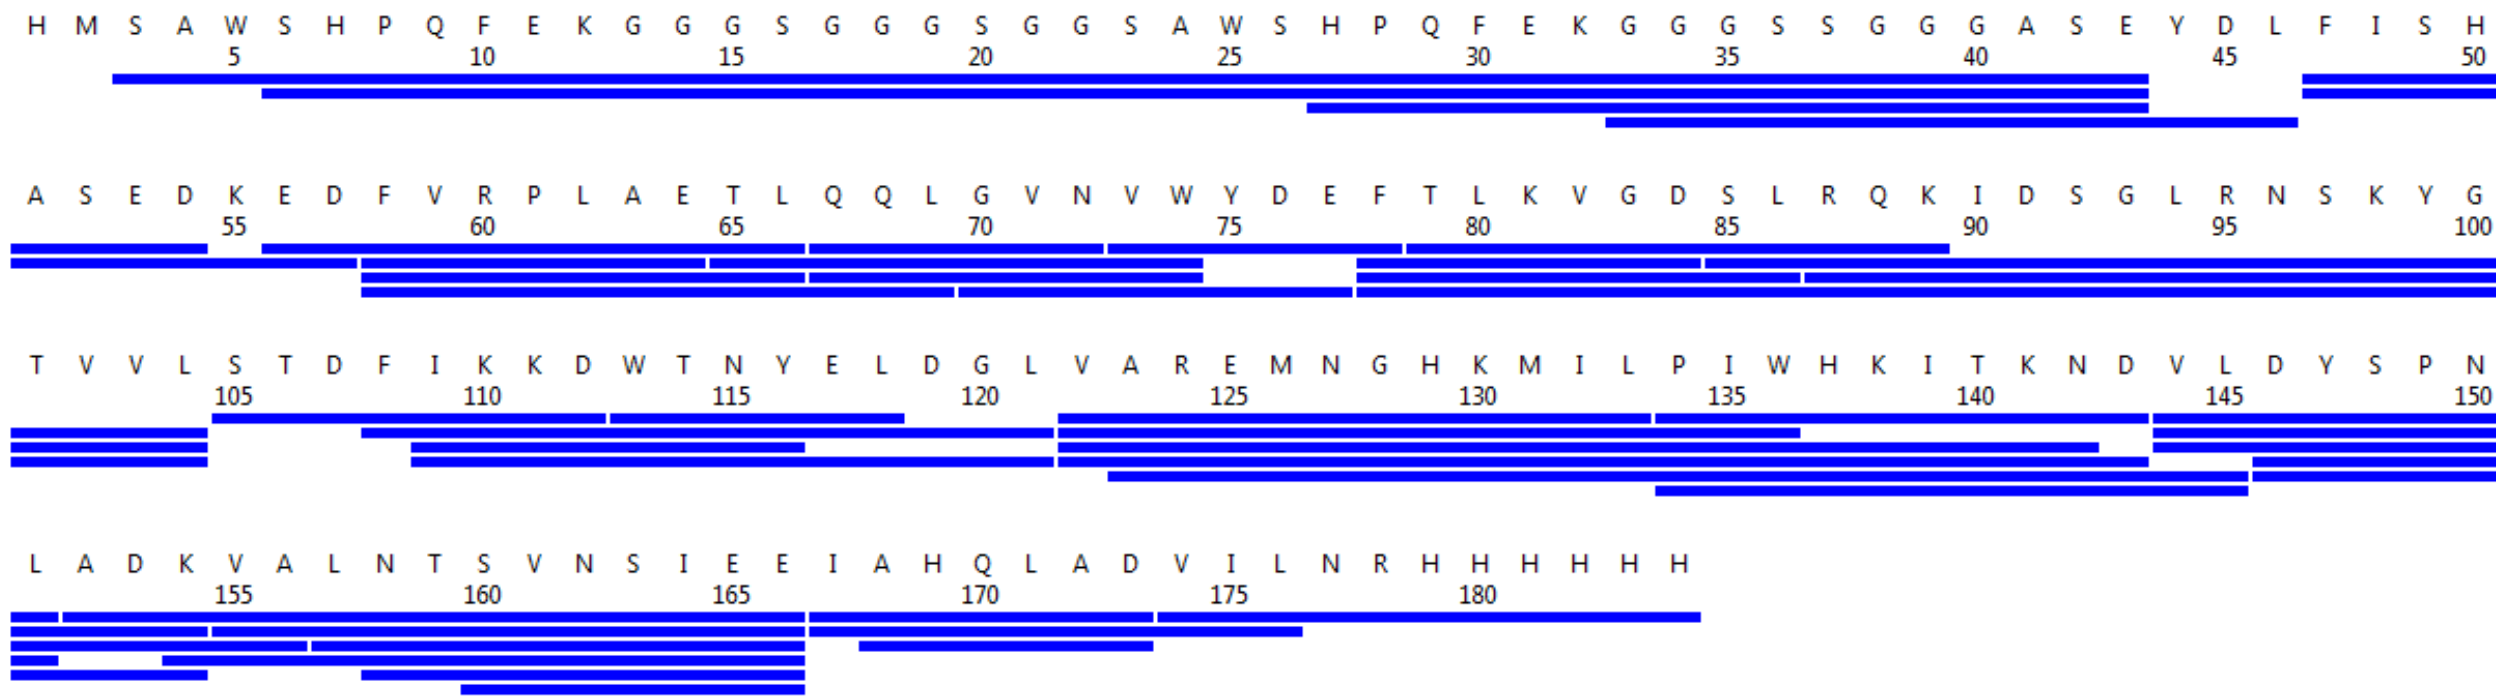

Total: 48 Peptides, 98.9% Coverage, 3.35 Redundancy

sFig 5

Supplement: mmc6.pdf [file mmc6.pdf]
